1           **Oncogenic *PIK3CA* promotes cellular stemness in an allele dose-dependent manner**

2  
3    Ralitsa R. Madsen<sup>a,b,g</sup>, Rachel G. Knox<sup>a,b</sup>, Wayne Pearce<sup>c</sup>, Saioa Lopez<sup>d,e</sup>, Betania Mahler-Araujo<sup>a,f</sup>,  
4    Nicholas McGranahan<sup>d,e</sup>, Bart Vanhaesebroeck<sup>c</sup>, Robert K. Semple<sup>1,g,a,b</sup>

5  
6  
7    <sup>a</sup> Metabolic Research Laboratories, Wellcome Trust-MRC Institute of Metabolic Science, University of  
8    Cambridge, Cambridge CB2 0QQ, UK

9    <sup>b</sup> The National Institute for Health Research Cambridge Biomedical Research Centre, Cambridge CB2 0QQ, UK

10   <sup>c</sup> University College London Cancer Institute, Paul O'Gorman Building, University College London, London  
11    WC1E 6DD, UK

12   <sup>d</sup> Cancer Research UK Lung Cancer Centre of Excellence, University College London Cancer Institute,  
13    University College London, London WC1E 6DD, UK

14   <sup>e</sup> Cancer Genome Evolution Research Group, University College London Cancer Institute, University College  
15    London, London WC1E 6DD, UK

16   <sup>f</sup> Histopathology Department, Cambridge University Hospitals NHS Foundation Trust, Cambridge CB2 0QQ, UK

17   <sup>g</sup> Centre for Cardiovascular Science, Queen's Medical Research Institute, University of Edinburgh, Edinburgh  
18    EH16 4TJ, UK

19  
20  
21  
22  
23   <sup>1</sup> Correspondence: [rsemple@ed.ac.uk](mailto:rsemple@ed.ac.uk)

24  
25  
26  
27  
28  
29  
30  
31  
32  
33  
34  
35  
36  
37  
38  
39  
40  
41  
42  
43  
44  
45  
46  
47  
48  
49  
50

## Abstract

The *PIK3CA* gene, which encodes the p110 $\alpha$  catalytic subunit of PI3-kinase (PI3K), is mutationally activated in cancer and in overgrowth disorders known as *PIK3CA*-related overgrowth spectrum (PROS). To determine the consequences of genetic *PIK3CA* activation in a developmental context of relevance to both PROS and cancer, we engineered isogenic human induced pluripotent stem cells (iPSCs) with heterozygous or homozygous knock-in of *PIK3CA*<sup>H1047R</sup>. While heterozygous iPSCs remained largely similar to wild-type cells, homozygosity for *PIK3CA*<sup>H1047R</sup> caused widespread, cancer-like transcriptional remodeling, partial loss of epithelial morphology, upregulation of stemness markers and impaired differentiation to all three germ layers *in vitro* and *in vivo*. Genetic analysis of *PIK3CA*-associated cancers revealed that 64 % had multiple oncogenic *PIK3CA* copies (39 %) or additional PI3K signaling pathway-activating “hits” (25 %). This contrasts with the prevailing view that *PIK3CA* mutations occur heterozygously in cancer. Our findings suggest that a PI3K activity threshold determines pathological consequences of oncogenic *PIK3CA* activation and provide the first insight into the specific role of this pathway in human pluripotent stem cells.

**Keywords:** PI3K, cancer, overgrowth, pluripotent stem cells, genetics, PROS

## Significance Statement

The *PIK3CA* H1047R mutation is a common cancer “driver”, and also causes an array of benign but highly disfiguring overgrowth disorders. Human induced pluripotent stem cells engineered to express two copies of *PIK3CA*-H1047R undergo cancer-like transcriptional remodeling and lose their ability to exit the stem cell state. A single mutant copy of *PIK3CA*-H1047R, as observed in non-cancerous overgrowth, had minimal effect on the stem cells and was fully compatible with normal differentiation. Combined with the finding of multiple *PIK3CA* mutant copies in human cancers, this suggests that a signaling threshold determines the disease consequences of *PIK3CA*-H1047R, one of the commonest human oncogenic mutations.

## 51 Introduction

52 Class IA phosphoinositide 3-kinases (PI3Ks) are essential components of the intracellular signaling  
53 cascades triggered by multiple growth factors, especially those acting *via* cell membrane receptor tyrosine kinases.  
54 Prominent among these are the insulin and insulin-like growth factor receptors. PI3K signaling is coupled to  
55 downstream activation of AKT and mammalian target of rapamycin complex 1 (mTORC1), which play key roles  
56 in organismal growth and development (1–3).

57 Strongly kinase-activating mutations in *PIK3CA*, the gene encoding the catalytic p110 $\alpha$  subunit of PI3K,  
58 are among the most frequently observed oncogenic events in a range of human tumors (4). Although widely referred  
59 to as cancer “drivers”, the same mutations have also been identified in non-malignant, albeit often severe, overgrowth  
60 disorders (5). These disorders are caused by postzygotic mosaic *PIK3CA* mutations and are phenotypically diverse,  
61 reflecting different patterns of mutation distribution and likely also different strengths of PI3K activation.

62 The commonest *PIK3CA* “hotspot” variant, H1047R, has been studied extensively in cancer models, both  
63 in cells and *in vivo*. Endogenous, heterozygous expression in mice seemingly only results in cancer development in  
64 combination with additional oncogenic drivers (6–11), while transgenic overexpression of this *PIK3CA* mutant  
65 does lead to early malignancy (12–17). In cultured cells, *PIK3CA*<sup>H1047R</sup> overexpression, but not heterozygous  
66 expression from the endogenous locus, leads to cellular transformation (18, 19). In human tumors, *PIK3CA*  
67 mutations are not mutually exclusive with other oncogenic alterations within the PI3K pathway (20), suggesting that  
68 stronger pathway activation may be required for malignant progression. This is supported by the benign nature of  
69 the overgrowth in PROS where *PIK3CA*<sup>H1047R</sup> heterozygosity is not sufficient to cause cancer. Despite this  
70 circumstantial evidence of dose-dependent effects of genetic PI3K activation, this has not been examined directly  
71 owing to the paucity of isogenic experimental models with endogenous expression of a defined number of oncogenic  
72 variants.

73 Disorders such as PROS illustrate that understanding aberrant development may hold lessons for cancer  
74 (21). Malignant transformation of cells typically involves dedifferentiation, reactivation of developmental pathways  
75 and phenotypic plasticity. *PIK3CA*<sup>H1047R</sup> was recently linked to induction of multipotency and cellular  
76 dedifferentiation in two mouse models of breast cancer (8, 16). Overexpression of wild-type (WT) *PIK3CA* in the  
77 head and neck epithelium of a mouse model of oral carcinogenesis has also been associated with dedifferentiation  
78 and epithelial-to-mesenchymal transition, increased transforming growth factor  $\beta$  (TGF $\beta$ ) signaling and upregulated

79 expression of the pluripotency factors *Nanog* and *Pou5f1* (*Oct3/4*) (22). Despite the insights gained from these and  
80 other mouse models of oncogenic *PIK3CA*, efforts to establish *in vivo* models of PROS have highlighted that species  
81 differences may constrain extrapolation from model organisms to the mechanisms of pathological PI3K activation  
82 in human disease (5).

83 Due to their unlimited self-renewal and differentiation capacity, human pluripotent stem cells are  
84 increasingly used as tools to develop more relevant human disease models (23). Their inherent similarities to cancer  
85 cells also make them an attractive system in which to study oncogenic processes (24). Thus, to study dose-dependent  
86 effects of pathological PI3K hyperactivation in a developmental system of relevance to cancer and PROS, we  
87 engineered isogenic human induced pluripotent stem cells (iPSCs) to express *PIK3CA*<sup>H1047R</sup> from one or both  
88 endogenous loci. Our data reveal clear dose-dependent developmental phenotypes downstream of p110 $\alpha$  activation,  
89 with homozygosity but not heterozygosity for *PIK3CA*<sup>H1047R</sup> promoting self-sustained stemness *in vitro* and *in vivo*.  
90 These findings emphasize the importance of using precisely-engineered models of cancer-associated *PIK3CA*  
91 variants to obtain a faithful representation of their biological effects and have implications for our understanding of  
92 PI3K activation in human disease.

93

## 94 **Results**

### 95 **Generation of human iPSCs with endogenous expression of *PIK3CA* H1047R**

96 To establish a cell model suitable for interrogation of allele dose-dependent consequences of p110 $\alpha$   
97 activation in human development and disease, we used CRISPR/Cas9 genome editing of well-characterized,  
98 karyotypically normal wild-type (WT) iPSCs to generate multiple isogenic clones either heterozygous ( $n = 3$ ) or  
99 homozygous ( $n = 10$ ) for the activating *PIK3CA*<sup>H1047R</sup> allele (**Figure 1a,b, Figure S1a**). To control for non-specific  
100 effects caused by genetic drift following so-called bottleneck selection (25, 26), we expanded six WT clones exposed  
101 to the gene targeting process. Sequencing of multiple clones of each genotype showed no evidence of mutagenesis  
102 of 17 computationally predicted CRISPR off-target sites (**Figure S1b**), and a normal karyotype was confirmed in  
103 three homozygous and two heterozygous clones more than 10 passages after targeting (**Figure S1c**), suggesting that  
104 *PIK3CA*<sup>H1047R</sup> does not lead to widespread genomic instability in these cells.

105 WT and *PIK3CA*<sup>WT/H1047R</sup> colonies had a similar microscopic appearance, whereas *PIK3CA*<sup>H1047R/H1047R</sup>  
106 clones exhibited aberrant colony morphology, characterized by disorganization of the normal epithelial appearance,



107 including pronounced F-Actin-rich protrusions visible on colony margins (**Figure 1c**). Homozygous cells also  
108 proved more adherent in routine passaging, requiring longer dissociation time than WT and heterozygous cultures.  
109 Nevertheless, *PIK3CA*<sup>H1047R/H1047R</sup> clones remained positive for the pluripotent stem cell markers NANOG, OCT3/4  
110 and TRA-1-60 (**Figure 1c**), consistent with preserved stem cell identity.

111

### 112 **Allele dose-dependent signaling effects of *PIK3CA*<sup>H1047R</sup>**

113 We next assessed PI3K signaling in *PIK3CA*<sup>WT/H1047R</sup> and *PIK3CA*<sup>H1047R/H1047R</sup> iPSCs. p110 $\alpha$  protein  
114 expression was reduced in both mutant genotypes and sometimes barely detectable in *PIK3CA*<sup>H1047R/H1047R</sup> cells.  
115 Despite this, immunoblotting revealed graded increases in AKT phosphorylation across *PIK3CA*<sup>WT/H1047R</sup> and  
116 *PIK3CA*<sup>H1047R/H1047R</sup> lines, both in growth factor-replete conditions (**Figure 2a**) and upon growth factor removal  
117 (**Figure 2b**). Consistent with previous findings in breast epithelial cells heterozygous for *PIK3CA*<sup>H1047R</sup> (19), both  
118 *PIK3CA*<sup>WT/H1047R</sup> and *PIK3CA*<sup>H1047R/H1047R</sup> cells also showed modest and graded increases in ERK phosphorylation.

119 Baseline PI3K pathway hyperactivation was inhibited in a dose-dependent manner by the p110 $\alpha$ -specific  
120 inhibitor BYL719, while the p110 $\beta$ -specific inhibitor TGX221 had no effect (**Figure 2c**). BYL719 did not reverse  
121 the allele dose-dependent downregulation of the p110 $\alpha$  protein, suggesting that it is not caused by acute negative  
122 feedback mechanisms. In both mutant genotypes, low-dose BYL719 (100 nM) reduced AKT phosphorylation to  
123 the level in untreated WT cells (**Figure 2c**), without inhibiting growth (**Figure S2a**). Relative to WT controls, mutant  
124 stem cells exhibited increased survival upon prolonged growth factor depletion, and this was also reversed by low-  
125 dose BYL719 (**Figure S2b**). A higher concentration of BYL719 (500 nM) was cytotoxic to both WT and  
126 *PIK3CA*<sup>WT/H1047R</sup> cells (**Figure S2a**), but not *PIK3CA*<sup>H1047R/H1047R</sup> cells, in which it reversed the aberrant colony  
127 morphology (**Figure S2a,c**).

128 We also examined responses to acute stimulation with insulin, insulin-like growth factor 1 (IGF1) or  
129 epidermal growth factor (EGF) (**Figure 2d**). *PIK3CA*<sup>WT/H1047R</sup> and *PIK3CA*<sup>H1047R/H1047R</sup> cells had high baseline AKT  
130 phosphorylation. This exceeded the level in IGF1-stimulated WT cells, but no consistent increase in the response to  
131 IGF1 was seen in mutant cells compared to WT (**Figure 2d**). Insulin did not elicit discernible AKT phosphorylation  
132 in any of the iPSC cells used. This apparent insulin resistance may be caused by the high concentration of insulin (3  
133  $\mu$ M) used in the maintenance medium (27), resulting in downregulation of insulin receptor expression at the plasma  
134 membrane (28). A modest increase in AKT phosphorylation in response to EGF was only observed in homozygous  
135 mutant cells. In contrast, EGF stimulation enhanced ERK phosphorylation above baseline in all iPSC lines, and this

136 was progressively enhanced across heterozygous and homozygous mutant cells (**Figure 2d**). These findings suggest  
137 that the MAPK/ERK pathway is primed to hyper-respond to growth factor stimulation in  $PIK3CA^{H1047R}$  stem cells,  
138 in an allele dose-dependent manner.

139

#### 140 **Transcriptomic effects of $PIK3CA^{H1047R}$ in pluripotent stem cells**

141 To determine the wider dose-dependent consequences of genetic p110 $\alpha$  activation, we profiled the protein-  
142 coding transcriptome of WT,  $PIK3CA^{WT/H1047R}$  and  $PIK3CA^{H1047R/H1047R}$  iPSCs, cultured in growth factor-replete  
143 conditions to mimic the *in vivo* milieu of the pluripotent epiblast. Multidimensional scaling demonstrated distinct  
144 transcriptomic signatures of WT, heterozygous and homozygous cells (**Figure 3a**). The transcriptome of  
145  $PIK3CA^{WT/H1047R}$  cells was nearly identical to WT controls, with only 131 differentially-expressed transcripts (FDR  
146 = 0.05). In contrast, homozygosity for  $PIK3CA^{H1047R}$  led to differential expression of 1,914 genes (**Figure 3a**). This  
147 indicates widespread transcriptional remodeling with a sharp allele dose-dependency, suggestive of a threshold  
148 effect.

149 KEGG annotation-based pathway analysis using all 1,914 differentially-expressed genes in  
150  $PIK3CA^{H1047R/H1047R}$  cells demonstrated significant changes to PI3K/AKT signaling, as expected. “Pathways in  
151 cancer” was identified as a common central node, demonstrating the power of our isolated genetic activation of PI3K  
152 to recapitulate signatures identified in the genetically far more chaotic context of tumors (**Figure 3b**). Other pathways  
153 identified as showing coherent perturbations were “Extracellular matrix-receptor interaction” and “Focal adhesion”,  
154 in keeping with the altered morphology and adhesion properties of homozygous mutants. Several genes involved in  
155 pluripotency regulation and WNT signaling were also differentially expressed. Finally, the TP53 pathway was found  
156 to be significantly altered (**Figure 3b**). This is consistent with prior evidence of TP53 activation in cell lines with  
157 hyperactivation of PI3K/AKT (29–32), however given the recent report that a substantial proportion of iPSC lines  
158 have *TP53* mutations (33), we sequenced the *TP53* gene of all clones. We found that two of the WT lines were  
159 indeed heterozygous for *TP53* C135F (**Figure S3a**), a mild loss-of-function allele based on biochemical assays in  
160 yeast (34). Despite this, inspection of each iPSC clone’s RNAseq data for the differentially expressed TP53 signaling  
161 genes showed that the signature difference in  $PIK3CA^{H1047R/H1047R}$  cells was not attributable to these two WT lines.

162 To identify potential drivers of the transcriptional changes in  $PIK3CA^{H1047R/H1047R}$  cells, we also undertook  
163 Ingenuity<sup>®</sup> Pathway Analysis of upstream regulators. This again revealed the expected activation of PI3K/AKT  
164 signaling. It also implicated factors important in stem cell regulation, including TGF $\beta$ , FGF2, TP53,  $\beta$ -catenin and

165 MYC (**Figure 3c**). TGF $\beta$  was the most significant prediction, and supporting increased signaling within this  
166 pathway, we found increased phosphorylation of SMAD2 in homozygous mutants (**Figure S3b**). These cells also  
167 had upregulated expression of *NODAL* (**Figure 3b, d**), a member of the TGF $\beta$  superfamily that maintains the  
168 pluripotent epiblast at early developmental stages and later induces primitive streak formation during gastrulation  
169 (35). Consistent with *NODAL*'s dual function, *PIK3CA*<sup>H1047R/H1047R</sup> cells exhibited a stemness signature (36)  
170 including upregulation of *NANOG*, *POU5F1* (*OCT3/4*), *MYC*, *KDR*, *IGF1R*, as well as upregulation of primitive  
171 streak markers such as *FGF4*, *GDF3* and *FOXA2* (**Figure 3b, d**). Upregulation of *NODAL* in WT and mutant cells  
172 was abolished by p110 $\alpha$ -specific inhibition with BYL719 (**Figure S3c**). In comparison, *NANOG* expression  
173 remained mostly unaffected by BYL719, with a trend towards downregulation after 48 h of p110 $\alpha$  inhibition  
174 (**Figure S3c**). These findings suggest upregulation of *NODAL* and enhanced TGF $\beta$ /SMAD2 signaling as a  
175 candidate mechanism whereby p110 $\alpha$  activation may exert effects on stemness in human pluripotent stem cells.

176

#### 177 **Homozygosity for *PIK3CA*<sup>H1047R</sup> confers self-sustained stemness upon embryoid bodies**

178 Embryoid bodies (EBs) are widely used to model lineage specification during gastrulation (37, 38).  
179 Previous studies have shown that *NODAL* overexpression in human pluripotent stem cell-derived EBs blocks  
180 differentiation to all three germ layers (39). Given the evidence for upregulated *NODAL* and TGF $\beta$  signaling in  
181 *PIK3CA*<sup>H1047R/H1047R</sup> cells, we tested whether the resulting EBs would behave similarly to *NODAL*-overexpressing  
182 EBs. EBs were established without TGF $\beta$  and FGF2, cultured in suspension for four days and allowed to generate  
183 adherent outgrowths for six days (**Figure 4a**). *PIK3CA*<sup>H1047R/H1047R</sup> stem cells consistently generated compact, cystic  
184 EBs that failed to bud and undergo internal reorganization (**Figure 4b**), with notable resemblance to mouse EBs  
185 overexpressing constitutively-active PDK1 or AKT1 (40). In adherent culture, *PIK3CA*<sup>H1047R/H1047R</sup> EB outgrowths  
186 resembled stem cell colonies (**Figure 4b**). Confirming this, *PIK3CA*<sup>H1047R/H1047R</sup> EB outgrowths stained positive for  
187 the stemness markers OCT3/4, *NANOG* and TRA-1-60 (**Figure 4c**). WT and *PIK3CA*<sup>WT/H1047R</sup> EBs, in contrast,  
188 exhibited complex morphologies in suspension and yielded heterogeneous outgrowths of differentiated cells which  
189 continued to mature during the experiment (**Figure 4b,c**).

190 The apparent differentiation block of *PIK3CA*<sup>H1047R/H1047R</sup> EBs was assessed transcriptionally using lineage-  
191 specific arrays and candidate gene quantitative PCR. Unlike WT and *PIK3CA*<sup>WT/H1047R</sup> EBs, homozygous mutants  
192 exhibited sustained expression of stemness genes and failed to upregulate germ layer-specific markers, both in

193 adherent cultures and in suspension (**Figure 4d, Figure S4a-d**). This phenotype persisted in the presence of serum,  
194 which is used to induce EB differentiation (**Figure 4d, Figure S4a**). Attempts to reverse the  $PIK3CA^{H1047R/H1047R}$  EB  
195 phenotype with the p110 $\alpha$  inhibitor BYL719 were unsuccessful due to poor EB survival in the presence of the drug,  
196 consistent with previous studies demonstrating high EB sensitivity to PI3K/mTOR inhibition (40–42).

197

### 198 **Heterozygosity for $PIK3CA^{H1047R}$ is compatible with directed definitive endoderm formation**

199 Heterozygosity for  $PIK3CA^{H1047R}$  did not produce major perturbations in the transcriptome of iPSCs nor in  
200 EB differentiation. Nevertheless, observation of  $PIK3CA$ -driven overgrowth in PROS suggests that mesodermal  
201 and neuroectodermal tissues are widely involved while tissues of endodermal origin are only rarely affected by  
202 strong activating mutations, raising the possibility of negative selection during endodermal development (5). We  
203 thus sought to undertake more systematic analysis of early differentiation in our human developmental models of  
204  $PIK3CA^{H1047R}$ . To overcome the high variability seen in self-aggregating, spontaneously-differentiating EBs, the  
205 protocol was modified (**Figure 5a**), incorporating use of microwell plates to ensure homogeneous EB size. EB  
206 formation was followed by three days of exposure to different concentrations of Activin A, BMP4 and FGF2 to  
207 promote mesoderm or definitive endoderm formation (43, 44). Lineage-specific gene expression arrays, candidate  
208 gene quantitative PCR and immunostaining assays were used to assess expression of multiple differentiation markers  
209 (**Figure 5b,c**). Mesoderm or endoderm induction led to increased expression of the expected lineage-specific  
210 markers (**Figure 5b, Figure S5**). The temporal pattern and relative expression levels of the analyzed genes was  
211 similar for  $PIK3CA^{WT/H1047R}$  and WT EBs (**Figure 5b, Figure S5**), and adherent outgrowths from both stained  
212 positive for mesoderm and endoderm markers at the end of the 10-day protocol (**Figure 5c**). The results of this assay  
213 argue against an inability of  $PIK3CA^{WT/H1047R}$  iPSCs to yield definitive endoderm.

214 We also subjected WT and  $PIK3CA^{H1047R}$ -harbouring cell lines to monolayer-based directed differentiation  
215 using a combination of low serum, inhibition of GSK3 and high levels of Activin A (45) (**Figure 6a**). The  
216 differentiation medium was also supplemented with DMSO (control) or BYL719 (100 nM), in anticipation that high  
217 PI3K signaling would be incompatible with two-dimensional definitive endoderm formation, as reported previously  
218 (46, 47). Unexpectedly, both  $PIK3CA^{WT/H1047R}$  and  $PIK3CA^{H1047R/H1047R}$  iPSCs differentiated successfully to definitive  
219 endoderm under these directed conditions, as evidenced by gene expression analysis and immunostaining (**Figure**  
220 **6b,c**). The dynamics of gene expression were closely similar across the three genotypes and were unaffected by  
221 p110 $\alpha$  inhibition (**Figure 6b**). Confirming that this was not a donor-specific effect, similar results were obtained with

222 isogenic WT and mutant iPSCs derived from a PROS patient with mosaic, heterozygous expression of the rare  
223 *PIK3CA*<sup>E418K</sup> allele (**Figure S6**). These findings suggest that PI3K activation is compatible with definitive endoderm  
224 formation *in vitro*, contrary to previous conclusions based on the use of non-specific pan-PI3K inhibitors with known  
225 off-target effects (46, 47), and do not support cell-autonomous negative selection in early lineage specification in  
226 PROS.

227

#### 228 **Allele dose-dependent effects of *PIK3CA*<sup>H1047R</sup> *in vivo***

229 To confirm that allele dose-dependent effects of *PIK3CA*<sup>H1047R</sup> were not artefacts of *in vitro* culture, we  
230 injected immunodeficient mice with WT or mutant iPSCs, and allowed them to form tumors over 5-8 weeks before  
231 histopathological assessment. WT and *PIK3CA*<sup>WT/H1047R</sup> tumors contained differentiated components of the three  
232 germ layers, including bone, cartilage, pigmented epithelium, nervous tissue and tubular endodermal structures  
233 (**Figure 7a, Table S1**). All *PIK3CA*<sup>WT/H1047R</sup> tumors exhibited better differentiated endoderm-derived tissues  
234 including respiratory (all lines) and gastrointestinal (one line) epithelium, corroborating the *in vitro* finding that  
235 heterozygosity for *PIK3CA*<sup>H1047R</sup> does not impair definitive endoderm formation. In contrast, differentiated  
236 components were either completely absent or very immature in the two *PIK3CA*<sup>H1047R/H1047R</sup> tumors (**Figure 7a,**  
237 **Table S1**), consistent with the inability of the parental cells to yield spontaneously-differentiated EBs. The least  
238 mature of the *PIK3CA*<sup>H1047R/H1047R</sup> tumors showed extensive recruitment of mouse stromal cells, forming septae  
239 separating lobules of immature human tissue (**Figure S7a**). Homozygous tumors also exhibited extensive necrosis  
240 and yolk sac-like tissue formation (**Figure 7a**), the latter suggested to be an *in vivo* characteristic of injected  
241 pluripotent stem cells with malignant potential (48). They also contained multiple foci positive for T BRACHYURY  
242 (immature mesoderm) and nuclear OCT3/4 (embryonal carcinoma marker in germ cell tumors) (**Figure S7c,d**).

243 These results are in line with the *in vitro* studies and demonstrate that homozygosity but not heterozygosity  
244 for *PIK3CA*<sup>H1047R</sup> promotes stemness of human pluripotent stem cells. Stem cells share many similarities with cancer  
245 cells, and phenotypes such as dedifferentiation and reactivation of developmental pathways have been linked to  
246 epithelial-to-mesenchymal transition and aggressive tumor behavior *in vivo* (49). *PIK3CA* mutations in human  
247 tumors are not mutually-exclusive with other oncogenic alterations promoting PI3K pathway activation, suggesting  
248 that further activation is positively selected for (50). This raises the possibility that our findings may be relevant to  
249 understanding the behavior of human cancer. We thus analyzed the prevalence of multiple oncogenic “hits” within  
250 the PI3K pathway using data from The Cancer Genome Atlas on cancer types with >10% prevalence of *PIK3CA*

251 mutations. In aggregate, 21% of these cancers had *PIK3CA* mutations. Nearly 40% of this subset had more than one  
252 copy of the mutation, and 25% also had a mutation in other selected PI3K pathway components (*PTEN*, *PIK3R1*,  
253 *AKT1/2/3*), or harbored a second *PIK3CA* variant (**Figure 7b**). This high frequency of additional mechanisms  
254 activating PI3K signaling in cancers provides circumstantial support for the notion that the strength of PI3K  
255 hyperactivation may be important for tumor progression *in vivo*.

256

## 257 **Discussion**

258 We present the first pluripotent stem cell model permitting assessment of the consequences of selective  
259 genetic p110 $\alpha$  activation specifically in a human developmental context. This is important given the well-  
260 documented differences between the pathways regulating mouse and human stem cell pluripotency and  
261 differentiation (51). By using CRISPR-mediated knock-in of *PIK3CA*<sup>H1047R</sup> into one or both endogenous *PIK3CA*  
262 alleles, we were able to examine the importance of mutant *PIK3CA* allele dosage for pathway activation and  
263 downstream cellular responses. Human pluripotent stem cells are useful not only for study of human embryogenesis  
264 but also of the effects of pathological PI3K signaling, as seen in PROS and cancer cells (52). The model we have  
265 generated may thus be useful for understanding oncogenic actions of *PIK3CA*<sup>H1047R</sup> in different contexts. By using  
266 expression from endogenous loci, by studying multiple clones of each genotype, and by controlling for non-specific  
267 variation introduced during the targeting process, we have minimized analytic problems arising from overexpression  
268 of the gene of interest and from non-specific genetic and chromosomal abnormalities.

269 *PIK3CA*<sup>H1047R</sup> increased PI3K signaling “tone” both in growth factor-replete and growth factor-depleted  
270 medium. Most strikingly, we report distinct allele dose-dependent effects of mutant *PIK3CA* on stemness and  
271 pluripotency *in vitro* and *in vivo*, with a corresponding major alteration of the transcriptome triggered at a threshold  
272 between heterozygous and homozygous p110 $\alpha$  activation. At odds with our finding in human stem cells,  
273 heterozygous expression of *PIK3CA*<sup>H1047R</sup> in a human MCF10A breast epithelial cell line has previously been shown  
274 to cause widespread transcriptional changes, illustrating the notion that small changes in a non-linear system can  
275 have extensive consequences (53, 54). However, the mutant cells in these studies also had amplification of  
276 chromosome 5p13-15 (54), a region harboring the gene encoding the catalytic subunit of telomerase. This could  
277 have contributed to the observed discrepancy to our study. Alternatively, thresholds at which p110 $\alpha$  signaling  
278 triggers its transcriptional effects may differ among cell types. Exemplifying this, either overexpression or



279 endogenous expression of *PIK3CA*<sup>H1047R</sup> induces multipotency in mammary tumors (8, 16), with the tumor cell of  
280 origin dictating phenotypic severity.

281 Although we describe the first stem cell-based study focusing on endogenous expression of the commonest  
282 pathogenic *PIK3CA* allele, several other studies have adopted different strategies to activate other components of the  
283 PI3K/AKT signaling cascade in this cell type (40, 55–58). Self-sustained stemness is a common motif in the  
284 phenotypes reported, and some studies, like ours, argue for discernible PI3K dose-dependency. For example, mouse  
285 pluripotent stem cells with homozygous knockout of the non-specific type IA PI3K negative regulator *Pten* exhibit  
286 impaired differentiation *in vitro* and *in vivo*, but this is not seen in heterozygous knockout cells (57). How strong  
287 PI3K activation sustains stemness remains to be determined, however our data suggest that induction of  
288 TGFβ/NODAL signaling is likely to be important. Supporting this, several transcriptional changes observed in  
289 *PIK3CA*<sup>H1047R/H1047R</sup> cells were reciprocal to those in human pluripotent stem cells exposed to pharmacological  
290 inhibition of TGFβ signaling (59). It is also possible that the direct link between PI3K activation and *NODAL*  
291 expression underlies the previously reported association between PI3K/AKT activation and expression of *NANOG*  
292 (56, 60), a key pluripotency gene controlled by SMAD2/3 (61).

293 Our report of marked allele dose-dependent effects of *PIK3CA*<sup>H1047R</sup> may have implications for  
294 understanding of PI3K-associated cancers. Many human cancers feature oncogenic alterations in *PIK3CA*, and not  
295 only are these frequently present in more than one copy, but they are also frequently accompanied by mutations of  
296 other pathway components, suggesting that cancer cells benefit from additional PI3K pathway activation. Future  
297 studies of the role of the PI3K pathway in cancer progression should incorporate consideration of PI3K signaling  
298 “dose” and the possibility of clear thresholds for biological consequences. Such considerations echo recent reports  
299 that an increased dosage of mutant *KRAS* influences clinical outcome and therapeutic targeting (62, 63). Based on  
300 our observations in human pluripotent stem cells with homozygosity for *PIK3CA*<sup>H1047R</sup>, it will be interesting to  
301 determine whether cancers with stronger activation of PI3K exhibit more aggressive features such as a higher degree  
302 of dedifferentiation and metastatic potential.

303 In contrast to the complex genetics of cancer, activating *PIK3CA* mutations arise heterozygously and in  
304 isolation in the severe overgrowth disorders known as PROS. An excess risk of adult cancer has not been reported  
305 in these mosaic disorders, in line with the notion that heterozygosity for *PIK3CA*<sup>H1047R</sup> alone is not sufficient to cause  
306 cellular transformation. PROS also illustrates the importance of control of p110α signaling in early human  
307 development. Overgrowth in PROS commonly affects mesodermal and neuroectodermal lineages but rarely

308 endoderm-derived tissues, prompting speculation that a sustained increase in PI3K activation impairs endoderm  
309 development (5). It has also been reported that class IA PI3K signaling is incompatible with directed definitive  
310 endoderm formation from human pluripotent stem cells, although this assertion is largely based on use of non-  
311 specific pan-PI3K inhibitors (46, 47). In our study, we found no evidence that genetic PI3K activation impairs guided  
312 definitive endoderm formation in culture. Moreover, *PIK3CA*<sup>WT/H1047R</sup> pluripotent stem cells gave rise to teratomas  
313 featuring well-differentiated endodermal components, arguing against a cell-autonomous defect in endoderm  
314 specification as an explanation for overall lack of endodermal overgrowth in PROS. The relatively mild biochemical  
315 and transcriptional consequences of heterozygous *PIK3CA* activation in stem cells, and their grossly normal early  
316 differentiation in several different experimental contexts suggests that any negative selection in certain lineages may  
317 be exerted only at later stages of differentiation. In contrast, homozygosity for *PIK3CA*<sup>H1047R</sup> in early development  
318 will likely be selected against due to impaired differentiation.

319 In summary, this study demonstrates that the cellular consequences of the most common oncogenic  
320 *PIK3CA* mutation are allele dose-dependent. The observed near binary differences between *PIK3CA*<sup>H1047R</sup>  
321 heterozygosity and homozygosity suggest that cells may have a PI3K signaling threshold that determines the  
322 pathological consequences of this variant in development and cancer.

323

#### 324 **Acknowledgements**

325 We thank Cornelia Gewert, James Warner from the Metabolic Research Laboratories (MRL) Histology Core and  
326 Gregory Strachan from the MRL Imaging Core. Technical assistance for this project was also provided by the UCL  
327 Cancer Institute Pathology Core Facility which is supported by the Cancer Research UK-University College London  
328 (CRUK-UCL) Centre Award [C416/A25145]. We thank Dr John Tadross and Dr Cheryl Scudamore for help with  
329 histopathological studies, Dr Marcella Ma and Dr Brian Lam from the MRL Genomics/Transcriptomics Core for  
330 RNA sequencing library preparation and raw read processing. We are grateful to Dr Adam Kashlak and Dr Matt  
331 Castle for advice on statistics and data processing, and to Dr Sarah Harrison, Dr Anne-Claire Guenantin and Dr Mo  
332 Mandegar for advice on stem cell maintenance and differentiation.

333

#### 334 **Author contributions**

335 Conceptualization: R.R.M., R.K.S. Methodology: R.R.M., R.K.S. Computation: R.R.M., S.P., N.M. Formal  
336 analysis: R.R.M., R.G.K., B.M.A., S.P., N.M. Investigation: R.R.M, R.G.K., W.P. Resources: B.V., R.K.S. Data



337 curation: R.R.M., R.G.K., S.P., N.M. Manuscript preparation: R.R.M., R.K.S. Manuscript review/editing: R.R.M.,  
338 B.V., R.K.S. Visualization/data presentation: R.R.M. Supervision: R.K.S. Project administration: R.R.M., R.K.S.  
339 Funding acquisition: R.R.M., B.V., R.K.S.

340

341 **Declaration of Interests**

342 B.V. is a consultant for Venthera (Palo Alto, US), iOnctura (Geneva, Switzerland) and Karus Therapeutics (Oxford,  
343 UK). N.M. has received consultancy fees from Achilles Therapeutics.

344

## 345 References

- 346 1. Fruman DA, et al. (2017) The PI3K Pathway in Human Disease. *Cell* 170(4):605–635.
- 347 2. Manning BD, Toker A (2017) AKT/PKB Signaling: Navigating the Network. *Cell*
- 348 169(3):381–405.
- 349 3. Saxton RA, Sabatini DM (2017) mTOR Signaling in Growth, Metabolism, and Disease. *Cell*
- 350 168(6):960–976.
- 351 4. Zhang Y, et al. (2017) A Pan-Cancer Proteogenomic Atlas of PI3K/AKT/mTOR Pathway
- 352 Alterations. *Cancer Cell*:1–13.
- 353 5. Madsen RR, Vanhaesebroeck B, Semple RK (2018) Cancer-Associated PIK3CA Mutations in
- 354 Overgrowth Disorders. *Trends Mol Med* 24(10):856–870.
- 355 6. Yuan W, et al. (2012) Conditional activation of Pik3caH1047R in a knock-in mouse model
- 356 promotes mammary tumorigenesis and emergence of mutations. *Oncogene* 32(3):318–326.
- 357 7. Tikoo A, et al. (2012) Physiological levels of Pik3caH1047R mutation in the mouse mammary
- 358 gland results in ductal hyperplasia and formation of ER $\alpha$ -positive tumors. *PLoS One* 7(5):1–
- 359 13.
- 360 8. Van Keymeulen A, et al. (2015) Reactivation of multipotency by oncogenic PIK3CA induces
- 361 breast tumour heterogeneity. *Nature* 525(7567):119–23.
- 362 9. Green S, Trejo CL, McMahon M (2015) PIK3CAH1047R Accelerates and Enhances
- 363 KRASG12D-Driven Lung Tumorigenesis. *Cancer Res* 75(24):5378–5391.
- 364 10. Berenjeno IM, et al. (2017) Oncogenic PIK3CA induces centrosome amplification and
- 365 tolerance to genome doubling. *Nat Commun* 8(1):1773.
- 366 11. Kinross KM, et al. (2012) An activating Pik3ca mutation coupled with Pten loss is sufficient to
- 367 initiate ovarian tumorigenesis in mice. *J Clin Invest* 122(2):553–557.
- 368 12. Engelman JA, et al. (2008) Effective use of PI3K and MEK inhibitors to treat mutant Kras
- 369 G12D and PIK3CA H1047R murine lung cancers. *Nat Med* 14(12):1351–1356.
- 370 13. Meyer DS, et al. (2011) Luminal expression of PIK3CA mutant H1047R in the mammary
- 371 gland induces heterogeneous tumors. *Cancer Res* 71(13):4344–4351.
- 372 14. Liu P, et al. (2011) Oncogenic PIK3CA-driven mammary tumors frequently recur via PI3K
- 373 pathway-dependent and PI3K pathway-independent mechanisms. *Nat Med* 17(9):1116–1120.
- 374 15. Hanker AB, et al. (2013) Mutant PIK3CA accelerates HER2-driven transgenic mammary
- 375 tumors and induces resistance to combinations of anti-HER2 therapies. *Proc Natl Acad Sci*
- 376 110(35):14372–14377.
- 377 16. Koren S, et al. (2015) PIK3CA(H1047R) induces multipotency and multi-lineage mammary
- 378 tumours. *Nature* 525(7567):114–8.
- 379 17. Yueh AE, et al. (2016) Colon cancer tumorigenesis initiated by the H1047R mutant PI3K.
- 380 *PLoS One* 11(2):1–11.
- 381 18. Isakoff SJ, et al. (2005) Breast cancer-associated PIK3CA mutations are oncogenic in
- 382 mammary epithelial cells. *Cancer Res* 65(23):10992–11000.
- 383 19. Gustin JP, et al. (2009) Knockin of mutant PIK3CA activates multiple oncogenic pathways.
- 384 *Proc Natl Acad Sci* 106(8):2835–40.
- 385 20. Yuan TL, Cantley LC (2008) PI3K pathway alterations in cancer: variations on a theme.
- 386 *Oncogene* 27(41):5497–5510.
- 387 21. Bellacosa A (2013) Developmental disease and cancer: Biological and clinical overlaps. *Am J*
- 388 *Med Genet Part A* 161(11):2788–2796.
- 389 22. Du L, et al. (2016) Overexpression of PIK3CA in murine head and neck epithelium drives
- 390 tumor invasion and metastasis through PDK1 and enhanced TGF $\beta$  signaling. *Oncogene*
- 391 35(35):4641–4652.
- 392 23. Gingold J, Zhou R, Lemischka IR, Lee DF (2016) Modeling Cancer with Pluripotent Stem
- 393 Cells. *Trends in Cancer* 2(9):485–494.
- 394 24. Ben-David U, Benvenisty N (2011) The tumorigenicity of human embryonic and induced
- 395 pluripotent stem cells. *Nat Rev Cancer* 11(4):268–277.
- 396 25. Veres A, et al. (2014) Low incidence of Off-target mutations in individual CRISPR-Cas9 and
- 397 TALEN targeted human stem cell clones detected by whole-genome sequencing. *Cell Stem*
- 398 *Cell* 15(1):27–30.
- 399 26. Ben-David U, et al. (2018) Genetic and transcriptional evolution alters cancer cell line drug
- 400 response. *Nature* 560(7718):325–330.
- 401 27. Chen G, et al. (2011) Chemically defined conditions for human iPSC derivation and culture.

- 402 *Nat Methods* 8(5):424–429.
- 403 28. Ronnett G V, Knutson VP, Lane MD (1982) Insulin-induced down-regulation of insulin  
404 receptors in 3T3-L1 adipocytes. *JBiolChem* 257(8):4285–4291.
- 405 29. Kim J-S, Lee C, Bonifant CL, Ransom H, Waldman T (2007) Activation of p53-dependent  
406 growth suppression in human cells by mutations in PTEN or PIK3CA. *Mol Cell Biol*  
407 27(2):662–77.
- 408 30. Astle M V, et al. (2012) AKT induces senescence in human cells via mTORC1 and p53 in the  
409 absence of DNA damage: implications for targeting mTOR during malignancy. *Oncogene*  
410 31(15):1949–1962.
- 411 31. Chen Z, et al. (2005) Crucial role of p53-dependent cellular senescence in suppression of Pten-  
412 deficient tumorigenesis. *Nature* 436(7051):725–730.
- 413 32. Miyauchi H, et al. (2004) Akt negatively regulates the in vitro lifespan of human endothelial  
414 cells via a p53/p21-dependent pathway. *EMBO J* 23(1):212–20.
- 415 33. Merkle FT, et al. (2017) Human pluripotent stem cells recurrently acquire and expand  
416 dominant negative P53 mutations. *Nature* 545(7653):229–233.
- 417 34. Brachmann RK, Vidal M, Boeke JD (1996) Dominant-negative p53 mutations selected in  
418 yeast hit cancer hot spots. *Proc Natl Acad Sci U S A* 93(9):4091–5.
- 419 35. Pauklin S, Vallier L (2015) Activin/Nodal signalling in stem cells. *Development* 142(4):607–  
420 619.
- 421 36. Brill LM, et al. (2009) Phosphoproteomic Analysis of Human Embryonic Stem Cells. *Cell*  
422 *Stem Cell* 5(2):204–213.
- 423 37. Ten Berge D, et al. (2008) Wnt Signaling Mediates Self-Organization and Axis Formation in  
424 Embryoid Bodies. *Cell Stem Cell* 3(5):508–518.
- 425 38. Brickman JM, Serup P (2016) Properties of embryoid bodies. *Wiley Interdiscip Rev Dev Biol*  
426 6(April):1–11.
- 427 39. Vallier L, Reynolds D, Pedersen RA (2004) Nodal inhibits differentiation of human embryonic  
428 stem cells along the neuroectodermal default pathway. *Dev Biol* 275(2):403–421.
- 429 40. Ling LS, Voskas D, Woodgett JR (2013) Activation of PDK-1 maintains mouse embryonic  
430 stem cell self-renewal in a PKB-dependent manner. *Oncogene* 32(47):5397–5408.
- 431 41. Bone HK, Welham MJ (2007) Phosphoinositide 3-kinase signalling regulates early  
432 development and developmental haemopoiesis. *J Cell Sci* 120:1752–1762.
- 433 42. Zhou J, et al. (2009) mTOR supports long-term self-renewal and suppresses mesoderm and  
434 endoderm activities of human embryonic stem cells. *Proc Natl Acad Sci U S A* 106(19):7840–  
435 7845.
- 436 43. Kattman SJ, et al. (2011) Stage-specific optimization of activin/nodal and BMP signaling  
437 promotes cardiac differentiation of mouse and human pluripotent stem cell lines. *Cell Stem*  
438 *Cell* 8(2):228–240.
- 439 44. Nostro MC, et al. (2011) Stage-specific signaling through TGF $\beta$  family members and WNT  
440 regulates patterning and pancreatic specification of human pluripotent stem cells. *Development*  
441 138(7):1445–1445.
- 442 45. Diekmann U, Lenzen S, Naujok O (2015) A reliable and efficient protocol for human  
443 pluripotent stem cell differentiation into the definitive endoderm based on dispersed single  
444 cells. *Stem Cells Dev* 24(2):190–204.
- 445 46. McLean AB, et al. (2007) Activin efficiently specifies definitive endoderm from human  
446 embryonic stem cells only when phosphatidylinositol 3-kinase signaling is suppressed. *Stem*  
447 *Cells* 25(1):29–38.
- 448 47. Touboul T, et al. (2010) Generation of functional hepatocytes from human embryonic stem  
449 cells under chemically defined conditions that recapitulate liver development. *Hepatology*  
450 51(5):1754–65.
- 451 48. Allison TF, et al. (2018) Assessment of established techniques to determine developmental  
452 and malignant potential of human pluripotent stem cells. *Nat Commun* 9(1):1–15.
- 453 49. Ye X, Weinberg RA (2015) Epithelial-Mesenchymal Plasticity: A Central Regulator of Cancer  
454 Progression. *Trends Cell Biol* 25(11):675–686.
- 455 50. Oda K, et al. (2008) PIK3CA cooperates with other phosphatidylinositol 3'-kinase pathway  
456 mutations to effect oncogenic transformation. *Cancer Res* 68(19):8127–8136.
- 457 51. Theunissen TW, Jaenisch R (2017) Mechanisms of gene regulation in human embryos and  
458 pluripotent stem cells. *Development* 144(24):4496–4509.

- 459 52. Papapetrou EP (2016) Patient-derived induced pluripotent stem cells in cancer research and  
460 precision oncology. *Nat Med* 22(12):1392–1401.
- 461 53. Kiselev VY, et al. (2015) Perturbations of PIP3 signalling trigger a global remodelling of  
462 mRNA landscape and reveal a transcriptional feedback loop. *Nucleic Acids Res*:gkv1015.
- 463 54. Hart JR, et al. (2015) The butterfly effect in cancer: A single base mutation can remodel the  
464 cell. *Proc Natl Acad Sci* 112(4):1131–1136.
- 465 55. Singh AM, et al. (2012) Signaling network crosstalk in human pluripotent cells: A Smad2/3-  
466 regulated switch that controls the balance between self-renewal and differentiation. *Cell Stem*  
467 *Cell* 10(3):312–326.
- 468 56. Watanabe S, et al. (2006) Activation of Akt signaling is sufficient to maintain pluripotency in  
469 mouse and primate embryonic stem cells. *Oncogene* 25(19):2697–2707.
- 470 57. Di Cristofano A, Pesce B, Cordon-Cardo C, Pandolfi PP (1998) Pten is essential for embryonic  
471 development and tumour suppression. *Nat Genet* 19(4):348–355.
- 472 58. Alva JA, Lee GE, Escobar EE, Pyle AD (2011) Phosphatase and Tensin Homolog Regulates  
473 the Pluripotent State and Lineage Fate Choice in Human Embryonic Stem Cells. *Stem Cells*  
474 29(12):1952–1962.
- 475 59. Vallier L, et al. (2009) Activin/Nodal signalling maintains pluripotency by controlling Nanog  
476 expression. *Development* 136(8):1339–49.
- 477 60. Storm MP, et al. (2007) Regulation of nanog expression by phosphoinositide 3-kinase-  
478 dependent signaling in murine embryonic stem cells. *J Biol Chem* 282(9):6265–6273.
- 479 61. Xu RH, et al. (2008) NANOG Is a Direct Target of TGFβ/Activin-Mediated SMAD Signaling  
480 in Human ESCs. *Cell Stem Cell* 3(2):196–206.
- 481 62. Mueller S, et al. (2018) Evolutionary routes and KRAS dosage define pancreatic cancer  
482 phenotypes. *Nature* 554(7690):62–68.
- 483 63. Burgess MR, et al. (2017) KRAS Allelic Imbalance Enhances Fitness and Modulates MAP  
484 Kinase Dependence in Cancer. *Cell* 168(5):817–829.e15.
- 485 64. Kreitzer FR, et al. (2013) A robust method to derive functional neural crest cells from human  
486 pluripotent stem cells. *Am J Stem Cells* 2(2):119–31.
- 487 65. Arbab M, Srinivasan S, Hashimoto T, Geijsen N, Sherwood RI (2015) Cloning-free CRISPR.  
488 *Stem Cell Reports* 5(5):908–917.
- 489 66. Miyaoka Y, et al. (2014) Isolation of single-base genome-edited human iPS cells without  
490 antibiotic selection. *Nat Methods* 11(3):291–3.
- 491 67. Bae S, Park J, Kim JS (2014) Cas-OFFinder: A fast and versatile algorithm that searches for  
492 potential off-target sites of Cas9 RNA-guided endonucleases. *Bioinformatics*.  
493 doi:10.1093/bioinformatics/btu048.
- 494 68. Martí M, et al. (2013) Characterization of pluripotent stem cells. *Nat Protoc* 8(2):223–53.
- 495 69. Rosner M, Hengstschläger M (2018) An antibody-based approach for the in situ evaluation of  
496 mouse contribution in human stem cell-derived xenografts. *Protoc Exch*:1–35.
- 497 70. Larionov A, Krause A, Miller W (2005) A standard curve based method for relative real time  
498 PCR data processing. *BMC Bioinformatics* 6:62.
- 499 71. Dobin A, et al. (2013) STAR: Ultrafast universal RNA-seq aligner. *Bioinformatics* 29(1):15–  
500 21.
- 501 72. Ritchie ME, et al. (2015) limma powers differential expression analyses for RNA-sequencing  
502 and microarray studies. *Nucleic Acids Res* 43(7):e47–e47.
- 503 73. Krämer A, Green J, Pollard J, Tugendreich S (2014) Causal analysis approaches in ingenuity  
504 pathway analysis. *Bioinformatics* 30(4):523–530.
- 505 74. Koboldt DC, et al. (2012) VarScan 2: Somatic mutation and copy number alteration discovery  
506 in cancer by exome sequencing. *Genome Res* 22(3):568–576.
- 507 75. Cibulskis K, et al. (2013) Sensitive detection of somatic point mutations in impure and  
508 heterogeneous cancer samples. *Nat Biotechnol* 31(3):213–219.
- 509 76. Wang K, Li M, Hakonarson H (2010) ANNOVAR: Functional annotation of genetic variants  
510 from high-throughput sequencing data. *Nucleic Acids Res* 38(16):1–7.
- 511 77. Van Loo P, et al. (2010) Allele-specific copy number analysis of tumors. *Proc Natl Acad Sci*  
512 107(39):16910–16915.
- 513 78. McGranahan N, et al. (2015) Clonal status of actionable driver events and the timing of  
514 mutational processes in cancer evolution. *Sci Transl Med* 7(283):1–12.
- 515 79. Liu P, Hwang JTG (2007) Quick calculation for sample size while controlling false discovery

516 rate with application to microarray analysis. *Bioinformatics* 23(6):739–746.  
517  
518  
519



520  
521  
522  
523  
524  
525  
526  
527  
528  
529  
530  
531  
532  
533  
534  
535  
536  
537  
538  
539  
540  
541  
542  
543  
544  
545  
546  
547  
548  
549  
550  
551  
552  
553  
554  
555  
556  
557  
558  
559  
560  
561  
562  
563  
564  
565  
566  
567  
568  
569  
570  
571  
572  
573  
574  
575  
576

## Figure Legends

**Figure 1. Generation of isogenic human pluripotent stem cells expressing  $PIK3CA^{H1047R}$  from one or both endogenous alleles.** **a.** Domain structure of the  $PIK3CA$  gene product p110 $\alpha$  and schematic of the CRISPR/Cas9 targeting strategy showing the two homology-directed repair (HDR) templates used alone or in combination. **b.** Representative sequences of heterozygous and homozygous  $PIK3CA^{H1047R}$  clones, all homozygous for the two silent mutations introduced by the targeting strategy. The number of independent clones of each genotype generated is provided next to the chromatograms. WT: wild-type. **c.** Representative light microscopy and immunofluorescence images of stem cell colonies from cultures with the indicated genotypes. F-Actin staining was used to visualize cell shape, and arrows highlight altered edge morphology and F-Actin-rich protrusions in  $PIK3CA^{H1047R/H1047R}$  colonies. Scale bars = 400  $\mu$ m (50  $\mu$ m for inserts). Images are representative of all clones of the corresponding genotype. The confocal images are of wild-type and mutant cells stained with antibodies against OCT3/4, NANOG and TRA-1-60. Images are representative of at least 2 independent experiments and clones per genotype. Scale bar = 100  $\mu$ m. See also Figure S1.

**Figure 2. Graded activation of PI3K signaling in  $PIK3CA^{H1047R}$  human pluripotent stem cells.** Immunoblots are shown for p110 $\alpha$  and p110 $\beta$  catalytic subunits of PI3K, and for total and phosphorylated AKT and ERK, with Coomassie-stained gels after transfer as a control. Numbers below bands indicate quantification by densitometry (arbitrary units). **a.** Signaling in cells collected 3 h after replenishment of growth factor (GF)-replete medium. Representative of  $\geq 3$  independent experiments. **b.** Signaling time course during short-term GF depletion. Representative of  $\geq 2$  independent experiments. **c.** Effects of 24 h of specific p110 $\alpha$  or p110 $\beta$  inhibition in GF-replete medium using BYL719 or TGX221, respectively. DMSO was used as control. Representative of 2 independent experiments. See also Figure S2. **d.** Response of cells to 2 h of GF depletion followed by 20 min stimulation with 10 nM of insulin (INS), insulin-like growth factor 1 (IGF1) or epidermal growth factor (EGF). GF-free DMEM/F12 medium (M) was used as control. The results are representative of 2 independent experiments. In all cases independent clones of the same genotypes were used for replicate experiments. Protein pool dilutions are included where possible to assess assay performance.

**Figure 3. Widespread transcriptional remodeling in  $PIK3CA^{H1047R/H1047R}$  pluripotent stem cells** **a.** Top: Multidimensional scaling (MDS) plot of transcriptomes of wild-type (WT),  $PIK3CA^{WT/H1047R}$  and  $PIK3CA^{H1047R/H1047R}$  human pluripotent stem cells profiled by RNAseq. Bottom: Venn diagrams showing overlap of upregulated and downregulated transcripts in  $PIK3CA^{H1047R}$  mutants compared to WT (FDR < 0.05; Benjamini-Hochberg; 3 clones per genotype). FC, fold-change. **b.** KEGG Pathway Enrichment Analysis undertaken using ClueGO on the 1,914 differentially regulated transcripts in  $PIK3CA^{H1047R/H1047R}$  iPSCs. Pathways shown were significantly enriched with FDR = 0.05 (Benjamini-Hochberg). Differentially expressed genes belonging to enriched pathways are shown in red (upregulated) or black (downregulated). The proportions of upregulated and downregulated genes within a pathway are represented in central pie charts. ECM, extracellular matrix. **c.** Ingenuity® Pathway Analysis (IPA) of upstream regulators in  $PIK3CA^{H1047R/H1047R}$  cells, based on all differentially expressed genes. Components with absolute activation z-score > 2 and p-value < 0.05 are highlighted in red. Selected components linked to PI3K signaling and pluripotency are labelled. **d.** Assessment of expression of selected epiblast genes based on the pathway analyses in 4b and 4c. Data were obtained in 2 independent experiments. Expression values were scaled to the WT or  $PIK3CA^{H1047R/H1047R}$  mean as indicated. Individual points correspond to separate cultures: 5 WT (3 clones), 3  $PIK3CA^{WT/H1047R}$  (2 clones) and 6  $PIK3CA^{H1047R/H1047R}$  (4 clones). All clones used for confirmation were distinct from those used to generate RNAseq data. See also Figure S3.

**Figure 4. Self-sustained stemness in  $PIK3CA^{H1047R/H1047R}$  embryoid bodies.** **a.** Schematic illustrating the protocol used for embryoid body (EB) formation and subsequent adherent culture. E6, Essential 6 medium; FBS, fetal bovine serum; FGF2, fibroblast growth factor 2; TGF $\beta$ , transforming growth factor  $\beta$ . **b.** Representative brightfield micrographs of wild-type (WT/WT),  $PIK3CA^{WT/H1047R}$  and  $PIK3CA^{H1047R/H1047R}$  cells at baseline (iPSC stage), 4 days (suspension), 10 days (adherent) and 13 days (suspension) following EB formation.  $PIK3CA^{H1047R/H1047R}$  iPSC colonies are refractile due to partial dissociation, while stem cell-like colonies emerging from adherent  $PIK3CA^{H1047R/H1047R}$  EBs are highly compact. In addition to the floating layers of differentiated cells shown here, WT and  $PIK3CA^{WT/H1047R}$  suspension cultures on day 13 also contained larger EB aggregates with complex morphologies and internal differentiation. Scale bar = 400  $\mu$ m. **c.** EB outgrowths were fixed on day 10 and stained for TRA-1-60 or co-stained for TUBB3/SOX17,  $\alpha$ -SMA/HAND1 or NANOG/OCT3/4. Hoechst was used for nuclear visualization. Images are representative of 2 independent experiments, using a single WT clone and 2 clones of each mutant. Scale bar = 100  $\mu$ m. **d.** Real time quantitative PCR analysis of stemness gene expression in EB outgrowths

577 in E6 medium without TGF $\beta$  and FGF2. Individual replicates shown in the panel are from 3-4 WT clones, 2  
578 *PIK3CA*<sup>WT/H1047R</sup> clones and 4 *PIK3CA*<sup>H1047R/H1047R</sup> clones. Duplicate outgrowth cultures of *PIK3CA*<sup>H1047R/H1047R</sup>  
579 clones are also shown. Expression values are in arbitrary units (A.U.). See also Figure S4.

580

581 **Figure 5. Heterozygosity for *PIK3CA*<sup>H1047R</sup> does not affect endoderm or mesoderm differentiation in**  
582 **embryoid bodies.** **a.** Schematic illustrating the AggreWell-based protocol for embryoid body (EB) culture with  
583 subsequent 3-day mesoderm or endoderm differentiation in suspension culture, followed by transfer to adherent  
584 conditions. D, day; E6, Essential 6 medium. **b.** Real time quantitative PCR scorecard-based profiling of lineage  
585 markers in wild-type (WT) and *PIK3CA*<sup>WT/H1047R</sup> EBs following mesoderm or endoderm induction. Gene heatmaps  
586 are shown across rows and are grouped according to lineage. Colors correspond to expression z-scores as indicated.  
587 "Endoderm" and "Mesoderm" indicate induction conditions. Results are from a single experiment examining the  
588 following replicates: day 4 endoderm: 2 WT clones and 2 cultures of a single H1047Rhet clone; day 4 mesoderm:  
589 1 WT clone and 3 H1047Rhet cultures from 2 clones; day 7 endoderm and mesoderm: 2 WT clones and 2 separate  
590 cultures of a single H1047Rhet clone. See also Figure S5 for RT-qPCR validation and additional replicates, including  
591 gene expression analysis on day 10. **c.** Representative confocal images of WT and H1047Rhet EB outgrowths on  
592 day 10 of the differentiation protocol, stained with antibodies against endoderm (AFP/SOX17) and mesoderm ( $\alpha$ -  
593 SMA/HAND1)-specific markers. Hoechst was used for nuclear visualization and F-Actin to for cell boundary  
594 demarcation. The images are from one clone per genotype. Scale bar = 100  $\mu$ m.

595

596 **Figure 6. *PIK3CA*<sup>H1047R</sup> is compatible with monolayer definitive endoderm differentiation.** **a.** Schematic of the  
597 protocol for definitive endoderm differentiation in monolayer culture. Adv., advanced; FBS, fetal bovine serum. **b.**  
598 Real time quantitative PCR analysis of lineage marker expression during differentiation in the presence of DMSO  
599 (control) or the p110 $\alpha$ -specific inhibitor BYL719 at 100 nM. Data from 2 independent experiments with WT vs  
600 *PIK3CA*<sup>H1047R/H1047R</sup> are shown side by side. 2 cultures of each of 2 clones per genotype were profiled. The time  
601 course data for *PIK3CA*<sup>WT/H1047R</sup> vs WT cells are from a single experiment using 2 cultures of 1 clone per genotype.  
602 Gene expression was scaled internally to the mean value of an appropriate time-point, and resulting values are  
603 arbitrary. See also Figure S6. **c.** Immunofluorescence staining for FOXA2 in WT, H1047Rhet and  
604 *PIK3CA*<sup>H1047R/H1047R</sup> definitive endoderm cultures at the end of differentiation. NucGreen was used for nuclear  
605 visualization. Note the higher cell density in *PIK3CA*<sup>H1047R/H1047R</sup> cultures, attributable to improved survival following  
606 single-cell passaging. Scale bar = 400  $\mu$ m.

607

608 **Figure 7. *PIK3CA*<sup>H1047R</sup> allele dose-dependent effects in tumor xenografts and genetic evidence for graded**  
609 **PI3K activation in cancers.** **a.** Hematoxylin and eosin-stained (H&E) sections of WT, *PIK3CA*<sup>WT/H1047R</sup> and  
610 *PIK3CA*<sup>H1047R/H1047R</sup> tumor xenografts derived from injection of human pluripotent stem cells into immunodeficient  
611 mice. The micrographs are from 2 tumors per genotype and are representative of a total of 5, 3 and 2 tumors from  
612 WT, *PIK3CA*<sup>WT/H1047R</sup> and *PIK3CA*<sup>H1047R/H1047R</sup> respectively. Yolk sac-like (YSL) and embryonal carcinoma-like  
613 (ECL) tissues, suggesting neoplastic transformation of cells within the original cultures, were more prevalent in  
614 *PIK3CA*<sup>H1047R/H1047R</sup> tumors, which also exhibited extensive necrosis (N); rare YSL foci were seen in two other  
615 tumors derived from the same WT clone. The only well differentiated tissue observed in *PIK3CA*<sup>H1047R/H1047R</sup> tumors  
616 was a focus of immature bone (B) in one. WT and *PIK3CA*<sup>WT/H1047R</sup> tumors in contrast comprised variable admixtures  
617 of well-differentiated and organized tissue derivatives of all three germ layers. GI, gastrointestinal tissue; mAT,  
618 mouse adipose tissue (confirmed by independent mouse vs human immunostaining with Cyclophilin A, see Figure  
619 S7b); PE, pigmented epithelium; RE, respiratory epithelium; SBLs, sebaceous-like tissue. See also Figure S7 and  
620 Table S1. **b.** The Cancer Genome Atlas was used to extract genomic data from *PIK3CA*-associated cancers. These  
621 were analyzed in aggregate for the presence or absence of mutant *PIK3CA* alleles, followed by stratification of  
622 *PIK3CA* mutant-positive samples based on the presence of multiple mutant alleles, including cases where the wild-  
623 type (WT) *PIK3CA* allele is lost (WT-). Alternatively, *PIK3CA* mutant-positive samples were screened for multiple  
624 distinct *PIK3CA* mutations (\*) or for the presence of additional mutations in proximal PI3K pathway components.  
625 **c.** Schematic of proximal class IA PI3K signaling.

626

627  
628

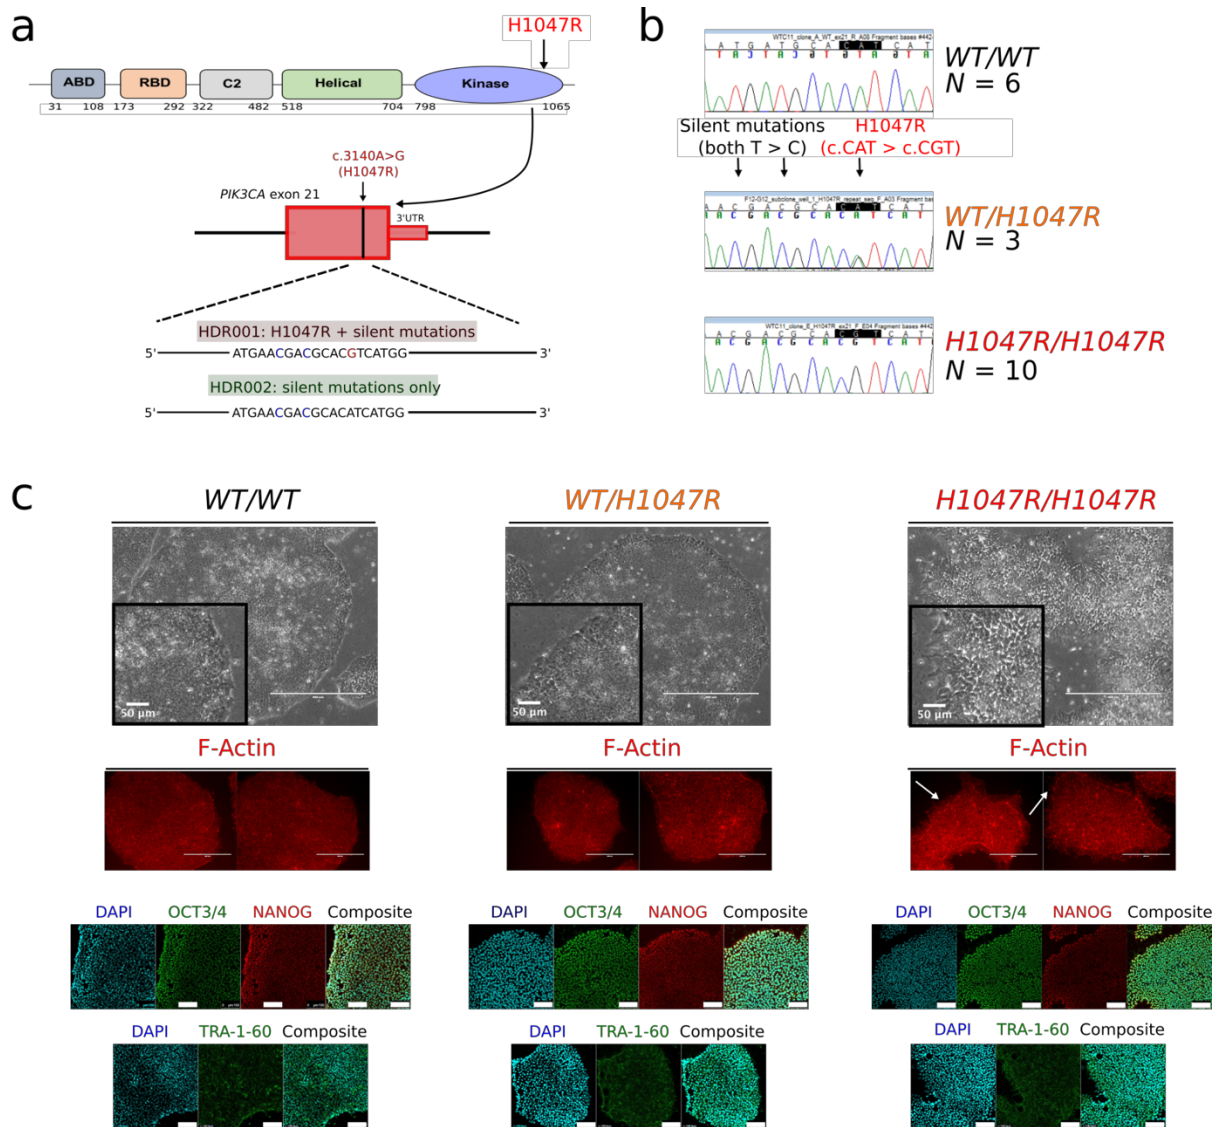

629  
630  
631  
632  
633

Figure 1





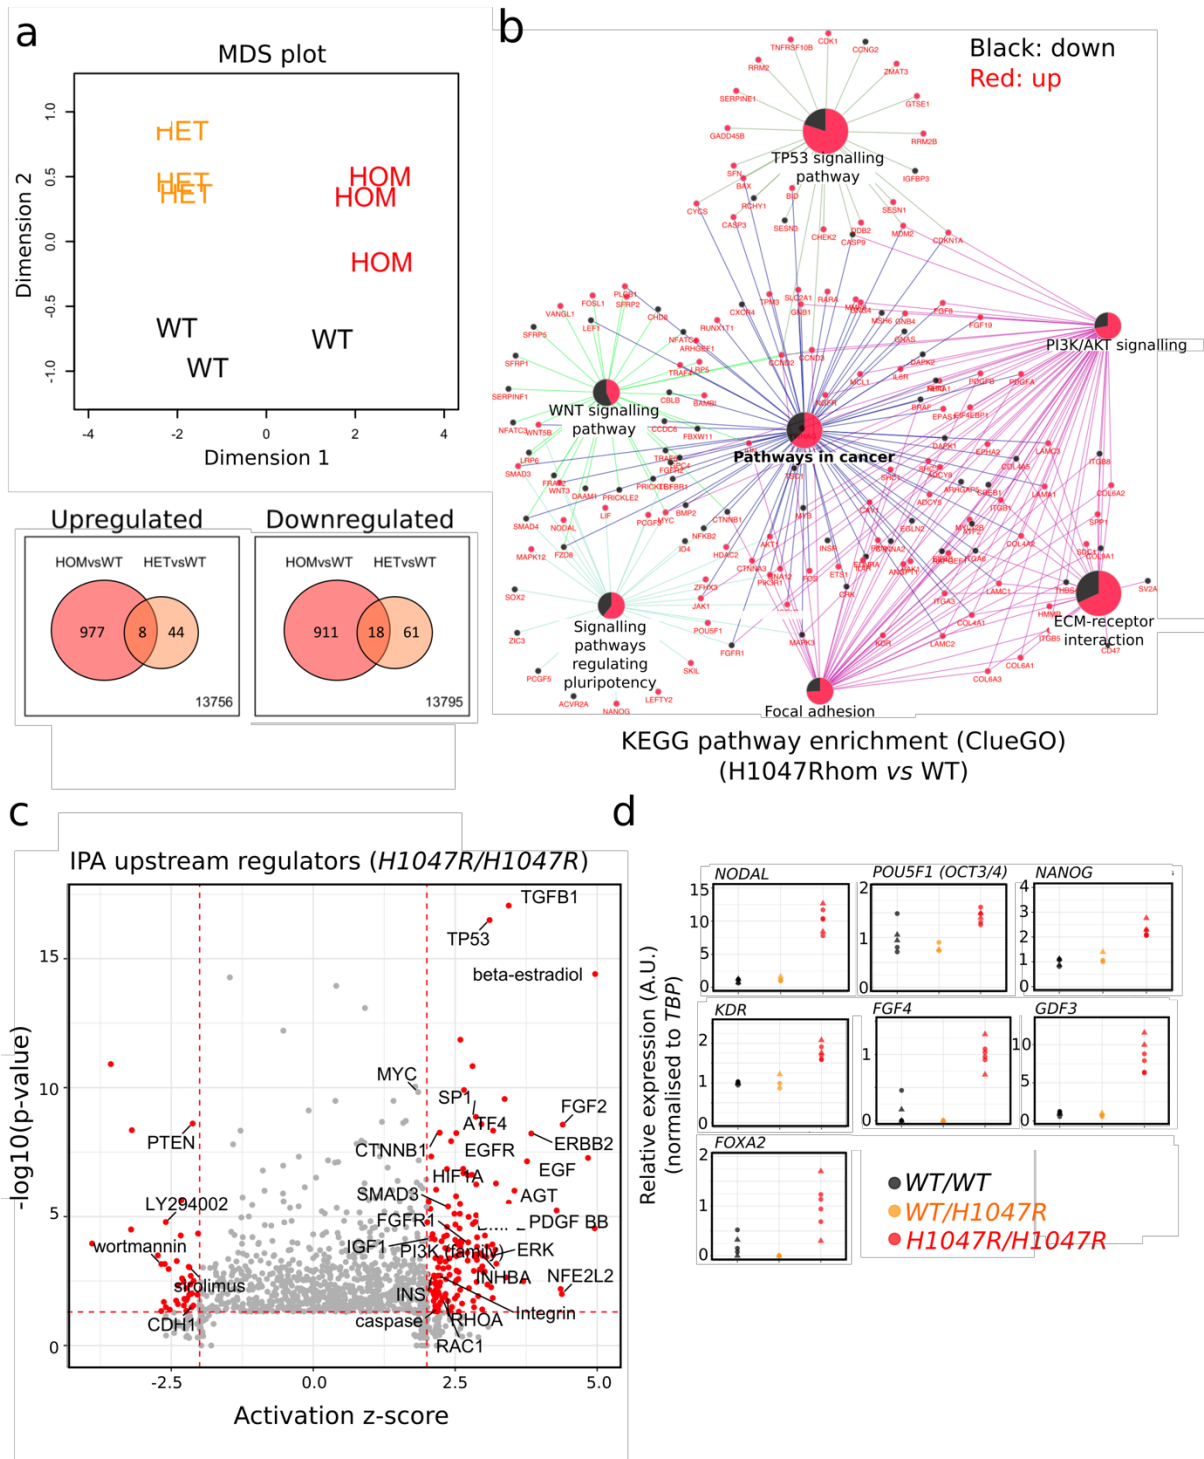

Figure 3

637  
638  
639

640

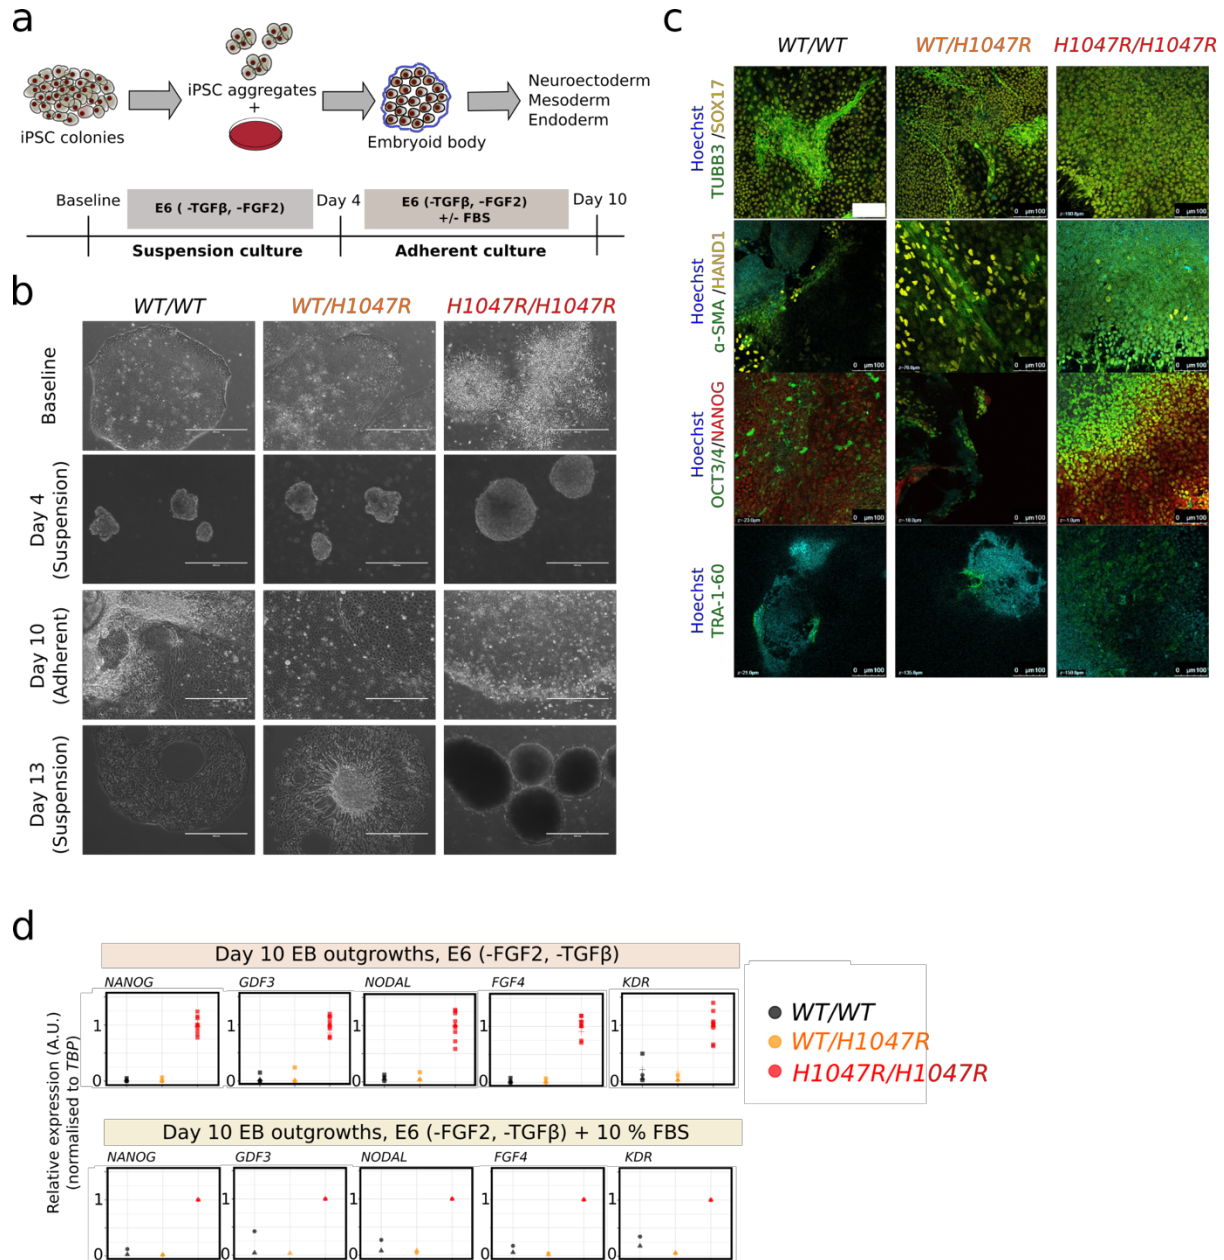

641  
642  
643

Figure 4

644

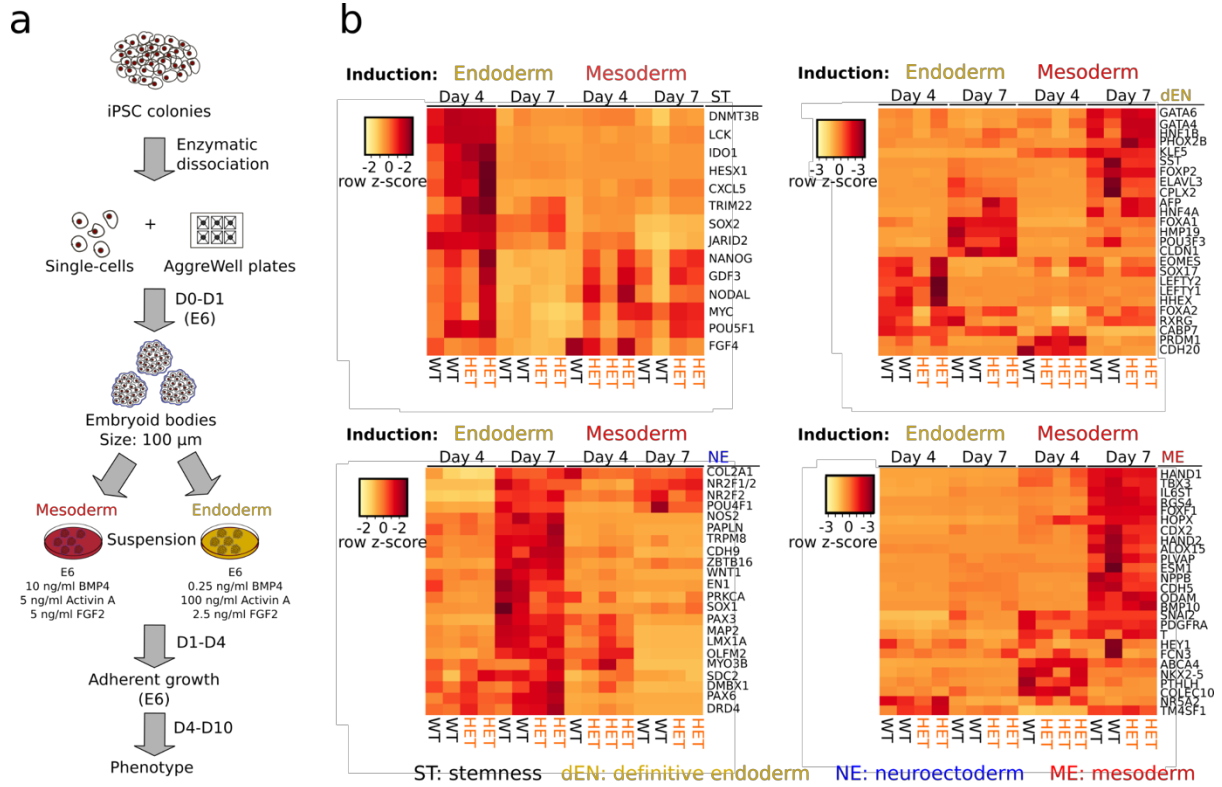

645  
646  
647

Figure 5



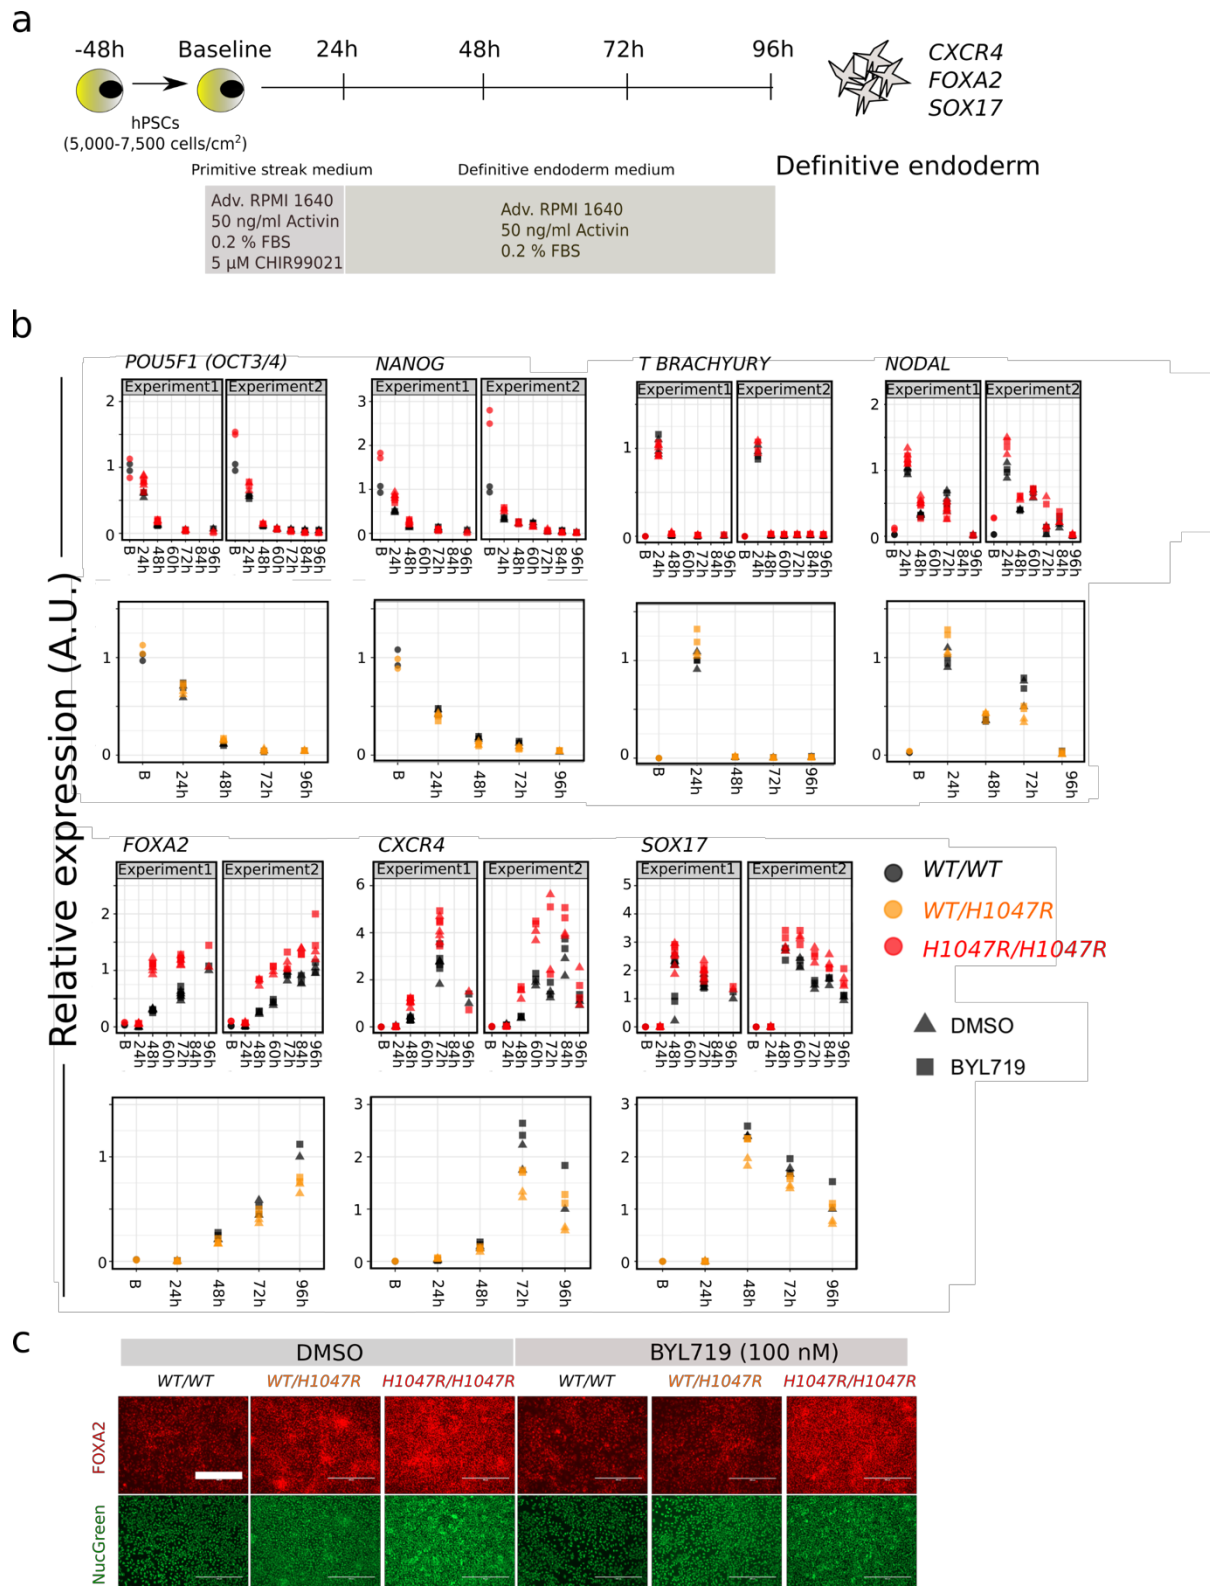

648  
650  
651  
652

Figure 6

653

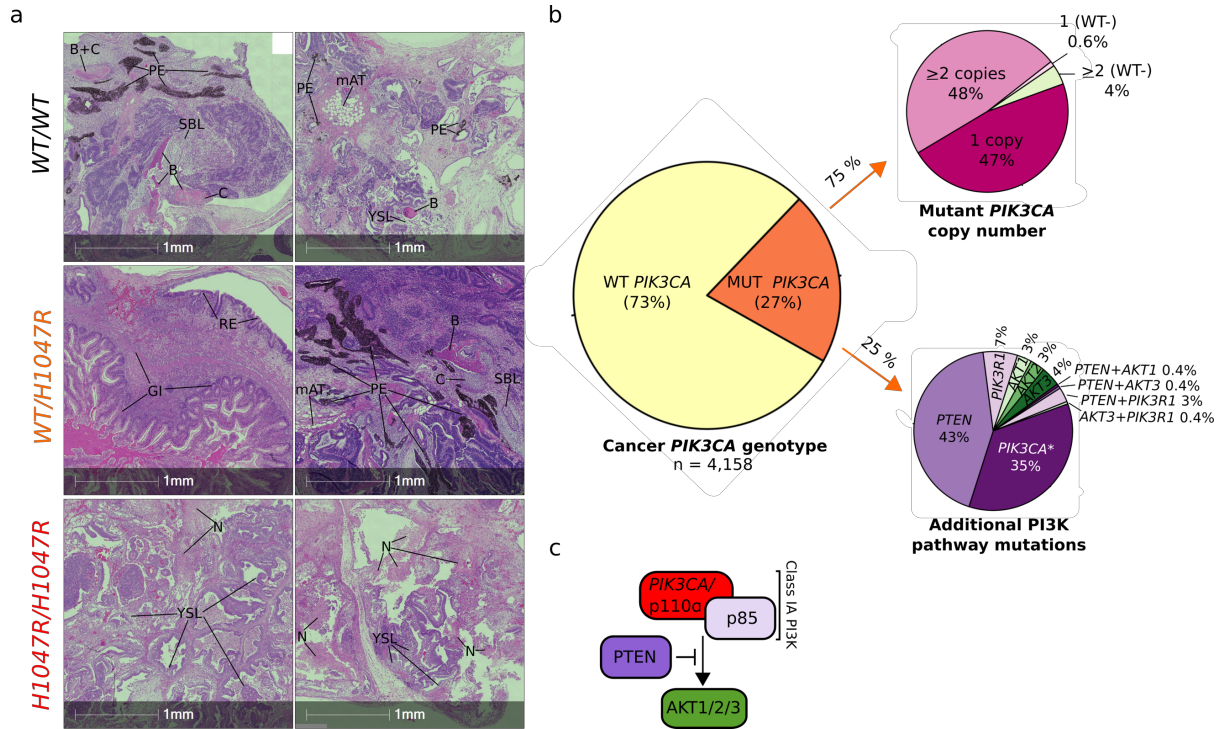

654  
655  
656  
657  
658  
659  
660

## 661 **Methods**

662

### 663 **EXPERIMENTAL MODEL AND SUBJECT DETAILS**

664

665 CRISPR/Cas9 targeting was performed on the male WTC11 induced pluripotent stem cell line  
666 (iPSC) line, a kind gift from Bruce Conklin (Gladstone Institute and UCSF). The derivation of this line  
667 has been described (64), and publicly available RNA, whole-exome and whole-genome sequencing data  
668 are available *via* the Conklin Lab's website (<https://labs.gladstone.org/conklin/pages/wtc-information>)  
669 or *via* the Coriell Institute (cat. no. GM25256). In the current work, the parental line was used for gene  
670 editing at passage numbers P37 and P38. The derived iPSCs were used for experiments between P45  
671 and P60.

672 The PROS patient-derived iPSC lines M98-WT and M98-E418K were obtained from a female,  
673 18-year-old PROS patient by episomal reprogramming of a dermal fibroblast culture with 32 %  
674 mosaicism for *PIK3CA*-E418K. All clones used for experimental studies were confirmed transgene-  
675 free and expressed high levels of PSC-specific markers, comparable to those of a reference human  
676 pluripotent stem cell (hPSC) line. Karyotyping on a single line from each genotype confirmed lack of  
677 microscopic genetic rearrangements.

678 Cells were grown at 37 °C and 5 % CO<sub>2</sub> in Essential 8 Flex (E8/F) medium on Geltrex-coated  
679 plates, in the absence of antibiotics. For maintenance, 70-90 % confluent cells were passaged as  
680 aggregates with ReLeSR, in the presence of the ROCK inhibitor RevitaCell (E8/F+R) during the first  
681 24 h to promote survival. For experiments that required precise control of cell numbers, hPSC colonies  
682 were dissociated into single cells with StemPro Accutase, prior to manual cell counting.

683 All cell lines were tested negative for mycoplasma and genotyped routinely to rule out cross-  
684 contamination during prolonged culture. STR profiling was not performed.

685

### 686 **METHOD DETAILS**

687

#### 688 **CRISPR/Cas9 targeting of hPSCs**

689 hPSCs were targeted with plasmid-delivered wild-type Cas9 (pX459, Addgene #48139) and  
690 gBlock-encoded FE-modified sgRNAs (65). Targeting was performed by nucleofection of 5 µg pX459  
691 plasmid (Cas9 wild-type), 3 µg sgRNA-encoding gBlock and either 200 pmol targeting template (for  
692 homozygous targeting) or a combination of 100 pmol targeting and "mock" templates (for heterozygous  
693 targeting). The nucleofected cells were seeded into Geltrex-coated 96-well plates and processed for sib-  
694 selection when ready for passaging. Sib-selection was performed as described previously (66), using  
695 25-100 cells/well in each subcloning round. Wild-type iPSC lines obtained in the process of subcloning  
696 were banked as genetically-matched controls.

#### 697 **Embryoid body (EB) differentiation assays**

698 EBs were established either by spontaneous self-aggregation of hPSCs or by forced aggregation  
699 into AggreWell plates. For self-aggregation, 50-70 % confluent hPSCs were dissociated into aggregates  
700 with ReLeSR, and the entire cell suspension from a 6-well transferred to one 60 mm Nunclon Sphera  
701 ultra-low attachment dish in Essential 6 (E6) medium supplemented with 0.4 % (w/v) polyvinylalcohol  
702 (PVA) and RevitaCell (E6/PVA+R). EBs formed within 24 h, after which the medium was exchanged  
703 with E6 (without PVA and RevitaCell). The medium was exchanged again on day 3 of EB formation.  
704 For adherent outgrowths, the EBs were transferred to Geltrex-coated 6-well plates on day 4, either in  
705 regular E6 or in E6 supplemented with 10 % (v/v) fetal bovine serum (FBS), 100 nM BYL719 or 0.01  
706 % (v/v) DMSO. The EBs from a single Nunclon Sphera dish were used to seed four wells of a 6-well  
707 plate or eight wells of a 12-well plate. EB outgrowths were collected for RNA extraction on day 10 of  
708 EB formation. In one experiment, suspension EBs were also collected on day 4 and day 13.

709 EB set-up in AggreWell plates followed the manufacturer's instructions, with E6/PVA+R as  
710 medium for cell seeding. A total of 2.4 x 10<sup>5</sup> cells were seeded in each well, for a final density of 200  
711 cells/microwell. EBs formed within 24 h, and the contents of four or five individual wells were  
712 transferred to a single Nunclon Sphera ultra-low attachment dish for culturing in either mesoderm (10  
713 ng/ml BMP4, 5 ng/ml Activin A, 5 ng/ml FGF2) or endoderm (0.25 ng/ml, 100 ng/ml Activin A, 2.5  
714 ng/ml FGF2) induction medium. After three days of induction, the EBs were transferred to Geltrex-

715 coated 6-well plates for adherent growth and maintained in E6 until day 10. Cells were collected for  
716 RNA extraction on day 0 (iPSC stage), day 4, day 7 and day 10 of EB formation.

717 For immunocytochemistry (see below), day 4 EBs were also seeded for adherent growth in  
718 Geltrex-coated 4-well or 35 mm Ibidi imaging and processed for staining on day 10.

### 719 **Definitive endoderm differentiation**

720 Definitive endoderm differentiation of hPSCs was carried out according to a modified version  
721 of the protocol described by (45). Cells were seeded in Geltrex-coated 12-well plates at densities  
722 between 5,000-7,500 cells/cm<sup>2</sup> (WT, *PIK3CA*<sup>WT/H1047R</sup>, *PIK3CA*<sup>H1047R/H1047R</sup>) or 8,500 cells/well<sup>2</sup> (WT,  
723 *PIK3CA*<sup>WT/E418K</sup>), seeding a minimum of two cultures per clone. Two days post-seeding, the cells were  
724 induced to differentiate in the presence of BYL719 (100 nM) or the corresponding dilution of DMSO.  
725 Samples were collected for RNA extraction at baseline (immediately before induction) and on each one  
726 of the following days of the differentiation protocol. In one experiment, cells were also fixed for  
727 immunofluorescence at the end of differentiation.

### 728 **Tumor xenografts assays**

729 Tumor xenografts were generated from a total of 10 iPSC cultures ( $N = 5$  WT,  $N = 3$   
730 *PIK3CA*<sup>WT/H1047R</sup>,  $N = 2$  *PIK3CA*<sup>H1047R/H1047R</sup>) by subcutaneous injection into immunodeficient, male NSG  
731 mice (Jackson #005557) at 12 weeks of age. Cells had been cultured according to standard procedures  
732 in Geltrex-coated T75 flasks, ensuring 95-100 % confluence on the day of injection. The cells were  
733 processed for aggregate dissociation with ReLeSR, collected in E8/F+R and centrifuged at 200g for 3  
734 min. Each cell pellet was resuspended in 130  $\mu$ l ice-cold E8/F+R, followed by mixing with 70  $\mu$ l ice-  
735 cold human ESC-qualified Matrigel. From this suspension, 200  $\mu$ l were used for injections within 30  
736 min of preparation (kept on ice throughout), using pre-chilled syringes (20.5 gauge needles). Individual  
737 animals were culled when tumors reached approximately 1.4 cm<sup>3</sup> in size, or if they became ill suddenly.  
738 All animal procedures were performed with approval from the local Animal Welfare Ethical Review  
739 Body (AWERB), and in accordance with Home Office regulations (The Animal [Scientific Procedures]  
740 Act 1986).

### 741 **Tumor histopathology**

742 Each tumor was processed for formalin fixation, paraffin embedding, microtome sectioning and  
743 hematoxylin and eosin (H&E) staining as described in (68). Individual tumors were cut in half before  
744 side-by-side paraffin embedding of the two halves, with the cut surfaces facing out to allow different  
745 areas of each tumor to be processed at the same time. A total of 12 sections (3  $\mu$ m each) were made per  
746 paraffin block and mounted on Superfrost Plus slides, yielding a total of 24 different tumor areas  
747 because of side-by-side embedding. Odd-number slides were processed for H&E staining and the rest  
748 used for immunohistochemistry. The slides were analyzed blindly by a human pathologist and  
749 processed for automated brightfield imaging on an AxioScan Z1 (Zeiss) slide scanner.

### 750 **RNA sequencing**

751 RNA was extracted as described above, followed by quantification and quality assessment on  
752 an Agilent Bioanalyzer using the RNA 6000 Nano Kit according to the manufacturer's instructions,  
753 confirming that all samples had a RIN score of 10. A total of 1  $\mu$ g per sample was used to synthesize  
754 50 bp long single end mRNA libraries with an Illumina TruSeq Stranded mRNA Library Prep Kit. The  
755 integrity and quantity of the libraries were determined on the Bioanalyzer using the DNA 12000 Kit.  
756 The barcoded libraries were pooled and sequenced on an Illumina HiSeq 4000, with an average depth  
757 of 20 million reads per sample. The raw reads were mapped to the human genome build GRCh38, and  
758 gene level counts were performed using Spliced Transcripts Alignment to a Reference (STAR) v2.5  
759 (71). Subsequent data processing followed the method outlined in (72).

### 760 *Pathway analyses*

761 Ingenuity® Pathway Analysis (build version 448560M, content version 36601845) was  
762 conducted on the 1,914 differentially expressed genes in *PIK3CA*<sup>H1047R/H1047R</sup> iPSCs, using the Ingenuity  
763 Knowledge Base (Genes Only) as reference set and including both direct and indirect relationships.  
764 Relationships were only considered if experimentally observed. The results from the Upstream



765 Regulator Analysis (73) were exported and processed for visualization in RStudio. Independently, the  
766 same set of genes were used for pathway analysis with the CytoScape plug-in ClueGO (v2.3.4),  
767 focusing on pathways within the KEGG ontology (Build 01.03.2017) and applying the following  
768 parameters: merge redundant groups with 50 % overlap; evidence codes used: all; statistical test:  
769 enrichment/depletion (two-sided hypergeometric test) with Benjamini-Hochberg correction; minimum  
770 number of genes per term = 10; minimum percentage enrichment = 4; Kappa Score Threshold = 0.4.  
771 The created network represents the pathway terms as nodes linked based on their term-term similarity,  
772 as determined by the Kappa Score. The size of the nodes reflects the enrichment significance of the  
773 terms, and only terms with  $FDR \leq 0.05$  are shown.

#### 774 **TCGA data analysis**

775 Somatic mutation tables (MAFs) from whole-exome sequencing data across 11 cancer types  
776 (BLCA, BRCA, CESC, CRC, ESCA, GMB, HNSC, LUSC, STAD, UCEC, UCS) were downloaded  
777 from the TCGA portal through the Genomic Data Commons (GDC) Data Transfer Tool. Mutation  
778 calls generated by Varscan2 (74) were used. To limit false positives, for those variants with a VAF  
779 ( $t\_alt\_count/t\_depth$ ) < 0.05, we retained those that were also identified by the MuTect2 algorithm (75).  
780 Functional annotation of genomic variants was performed with ANNOVAR (76). Purity, ploidy and  
781 copy number profiles of tumor cells were obtained with ASCAT (77) run using default parameters on  
782 SNP6.0 data.

783 Mutation multiplicity, or mutation-copy-number, describing the number of mutant copies of a  
784 mutation, is a function of the purity of the sample, the ploidy of the tumor cells and the relative  
785 frequency of the mutation (i.e. the VAF). The mutation multiplicity was calculated as previously  
786 described (78), using the following equation:

$$787 \quad \text{Mutation copy number} = (VAF/p) * ((p * CNt) + 2 * (1-p))$$

788 Where CNt is the local copy number at the mutated base and p is the estimated purity of the  
789 tumor sample. Mutations exhibiting a mutation multiplicity  $\geq 1.5$  were classified as 'gained'. If the  
790 mutation multiplicity was equal the local copy number and the genomic segment harboring the mutation  
791 was subject to LOH, the wildtype allele was inferred to be absent.

#### 792 **DATA PROCESSING**

793 Data processing and visualization were performed in RStudio (<https://www.rstudio.com/>).  
794 Individual measurements, rather than summary statistics, are displayed in all cases except for the  
795 RNAseq data. All raw data and bespoke RNotebooks containing guided scripts used to analyze larger  
796 datasets are available *via* the Open Science Framework ([link to be added upon acceptance](#)). The original  
797 RNAseq data have been deposited in the GEO, under accession number: GSEXXXXXX (to be done  
798 upon acceptance). All uncropped Western blots are provided as a separate supplemental file if required.  
799 This includes both blots that are displayed in the paper as well as additional replicates.

800

801

802  
803  
804  
805  
806  
807  
808  
809  
810  
811  
812  
813  
814  
815

### **Supplemental Material**

Separate PDF file with supplemental figures and tables

Separate PDF file with supplemental methods

Separate PDF file containing key resource information, including catalogue numbers, is available for upload upon acceptance.

Separate Word file containing all uncropped Western blots, including additional replicates, is available for upload upon acceptance
